# Supplementary material for: Targeted treatment of rat AKI induced by rhabdomyolysis using BMSC derived magnetic exosomes and its mechanism
Source: Royal Society of Chemistry journal article supplement (doi:10.1039/d4na00334a), 2024-01-01
Supplement: d4na00334a1.pdf [file d4na00334a1.pdf]

1

## Supporting Information

2       **Title** : Targeted treatment of glycerol-induced AKI in rats using BMSCs derived  
3 magnetic exosomes and its mechanism

4       **Author:**

5       Yuling Chen

6       Institute of Disaster and Emergency Medicine, Tianjin University, Tianjin, China.

7       Tianjin Key Laboratory of Disaster Medicine Technology, Tianjin, China.

8       Shike Hou

9       Institute of Disaster and Emergency Medicine, Tianjin University, Tianjin, China.

10       Tianjin Key Laboratory of Disaster Medicine Technology, Tianjin, China.

11       **Corresponding Author:** Yuling Chen

12       **E-mail**                       **addresses:**                       [chenyuling97@outlook.com](mailto:chenyuling97@outlook.com)

13      **Contents**

14 Supporting Information .....1

15 Supplementary .....3

16    Materials and Methods .....3

17      Prussian blue staining .....3

18      TEM.....3

19    Results.....4

20      Fig.S.1.....4

21      Fig.S.2.....4

22      Fig.S.3.....5

23      Fig.S.4.....6

24      Fig.S.5.....7

25      Fig.S.6.....8

26      Fig.S.7.....8

27      Fig.S.8.....9

28      Fig.S.9.....9

29      Fig.S.10.....10

30

31

# 32 **Supplementary**

## 33 **Materials and Methods**

### 34 **Prussian blue staining**

35 Make cell slides. Cells were fixed in polyformaldehyde solution at room  
36 temperature for 30 minutes and washed twice with PBS. The cells were incubated in a  
37 solution of 1% hydrochloric acid and 2% potassium ferrocyanide for 40 minutes,  
38 washed twice with distilled water, and re stained with nuclear fixation red for 15  
39 minutes. Then clean the cells twice with distilled water. Observation under an optical  
40 microscope: Iron nanoparticles appear as blue spots inside the cell, while the nucleus  
41 appears red.

### 42 **TEM**

43 The ultrastructural morphology of cells and exosomes was observed by  
44 transmission electron microscopy.

45 Exosomes were fixed in Sorensen buffer (pH 7.4) with 2% glutaraldehyde for 2  
46 hours, while exosomes contained in agarose gel were fixed in 0.1 M phosphate buffer  
47 with 2.5% glutaraldehyde and 2% paraformaldehyde. All samples were fixed in 1%  
48 osmium tetroxide for 2 hours before being cut. Then dehydrate the slices at a graded  
49 concentration of acetone and embed them into the Epon Araldite mixture. Inspect the  
50 semi thin section (with a thickness of 1  $\mu\text{m}$ ) using an optical microscope and stain with  
51 toluidine blue. Cut the ultra-thin section into 70 nm thick sections and place them on a  
52 Cu grid. Transmission electron microscopy images were collected using TEM at a  
53 voltage of 80 kV and equipped with a Megaview II camera for digital image acquisition.

54 Preparation of cell samples by treating BMSC with SPION 25  $\mu\text{g}/\text{mL}$ . After 24  
55 hours of incubation, the cells were separated and fixed at 2% glutaraldehyde solution  
56 for 2 hours at 4 ° C. Then, they were washed three times in buffer (pH 7.2) and treated  
57 at room temperature with 2.5% potassium ferrocyanide and 1% osmium tetroxide for 1  
58 hour. After washing, cells are dehydrated with acetone with a 30% increase in  
59 concentration ( $\times 2$ ) 50% ( $\times 2$ ) 70% ( $\times 2$ ) 90% ( $\times 2$ ) Then further dehydrate with 100%  
60 acetone. After drying, the sample was embedded overnight in a solution of epoxy resin  
61 and acetone (100%) (50:50), and then embedded in 100% epoxy resin for 4-5 hours.  
62 The sample was dried at 60 ° C for 2 days and then cut into thin slices of 70 nanometers.  
63 Use TEM to observe the internal situation of cells.

64 **Results**

65 **Fig.S.1.**

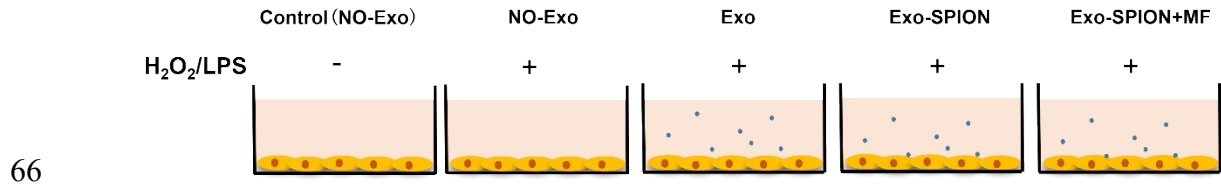

67 Fig.S.1. Cell grouping. Inoculate L6/NRK-52e in 6-well plate ( $1 \times 10^5$  cells/well) for 24 hours. After being  
68 stimulated for 10 minutes with H<sub>2</sub>O<sub>2</sub> (200  $\mu$ M) or LPS (100ng/mL) for 24 hours, the supernatant was replaced with  
69 the above conditioned medium and cultured at 37°C for 6 hours.

70 **Fig.S.2.**

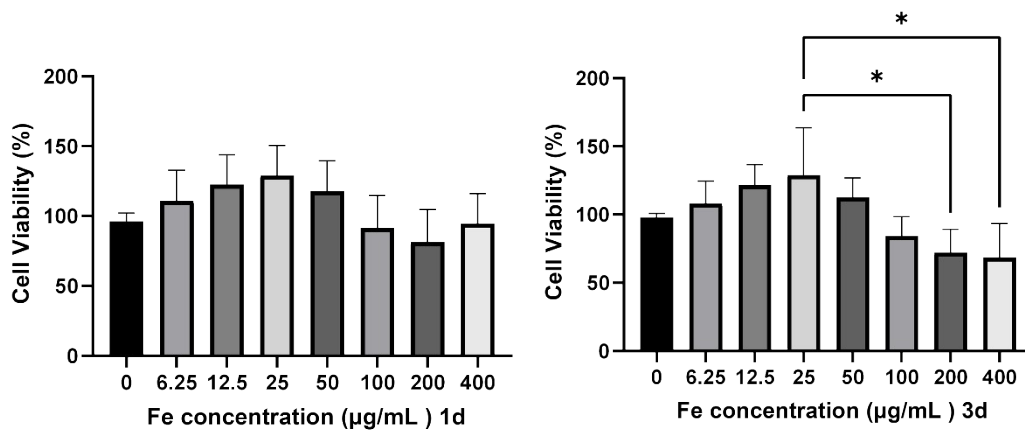

72 Fig.S.2. Toxicity study of the SPION on NRK-52e. CCK-8 assay was used to evaluate the proliferation of  
73 NRK-52e treated with different concentrations of SPION. (\*  $P < 0.05$ ,  $n=6$ ).

**Fig.S.3.**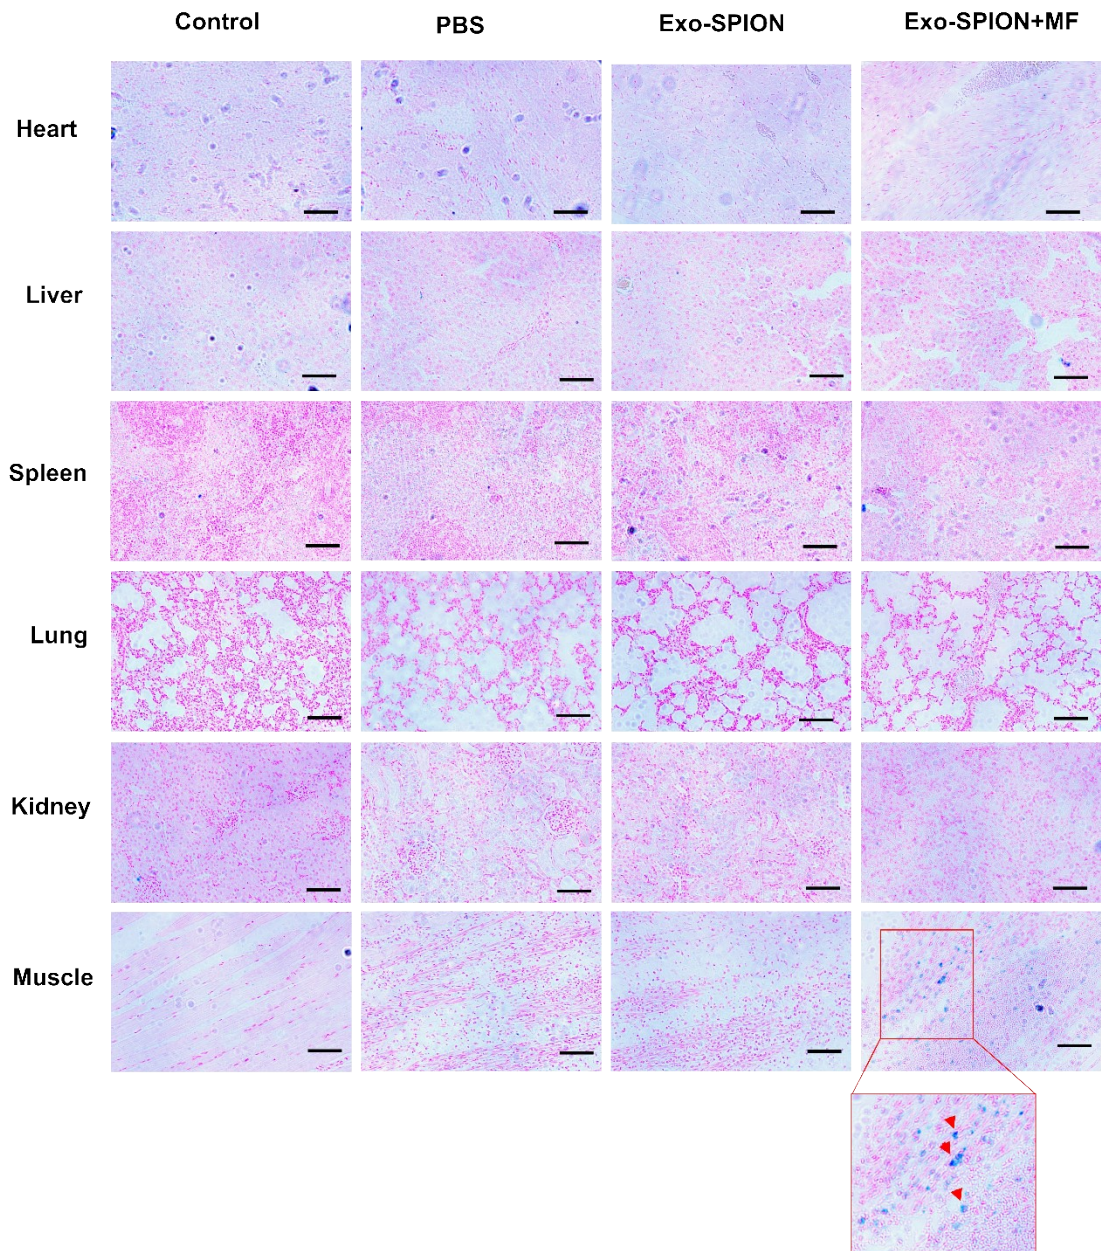

75

76 Fig.S.3. In vivo localization of Exo-SPION in rats AKI injury model under magnetic navigation. The  
 77 representative micrograph of Prussian blue staining of paraffin sections of heart, liver, spleen, lung, kidney and  
 78 gastrocnemius muscle on the third day after the tail vein injection of Exo-SPION in rats. The white arrow shows the  
 79 positioning of the Exo-SPION. Scale bar, 10  $\mu$ m.



**Fig.S.4.**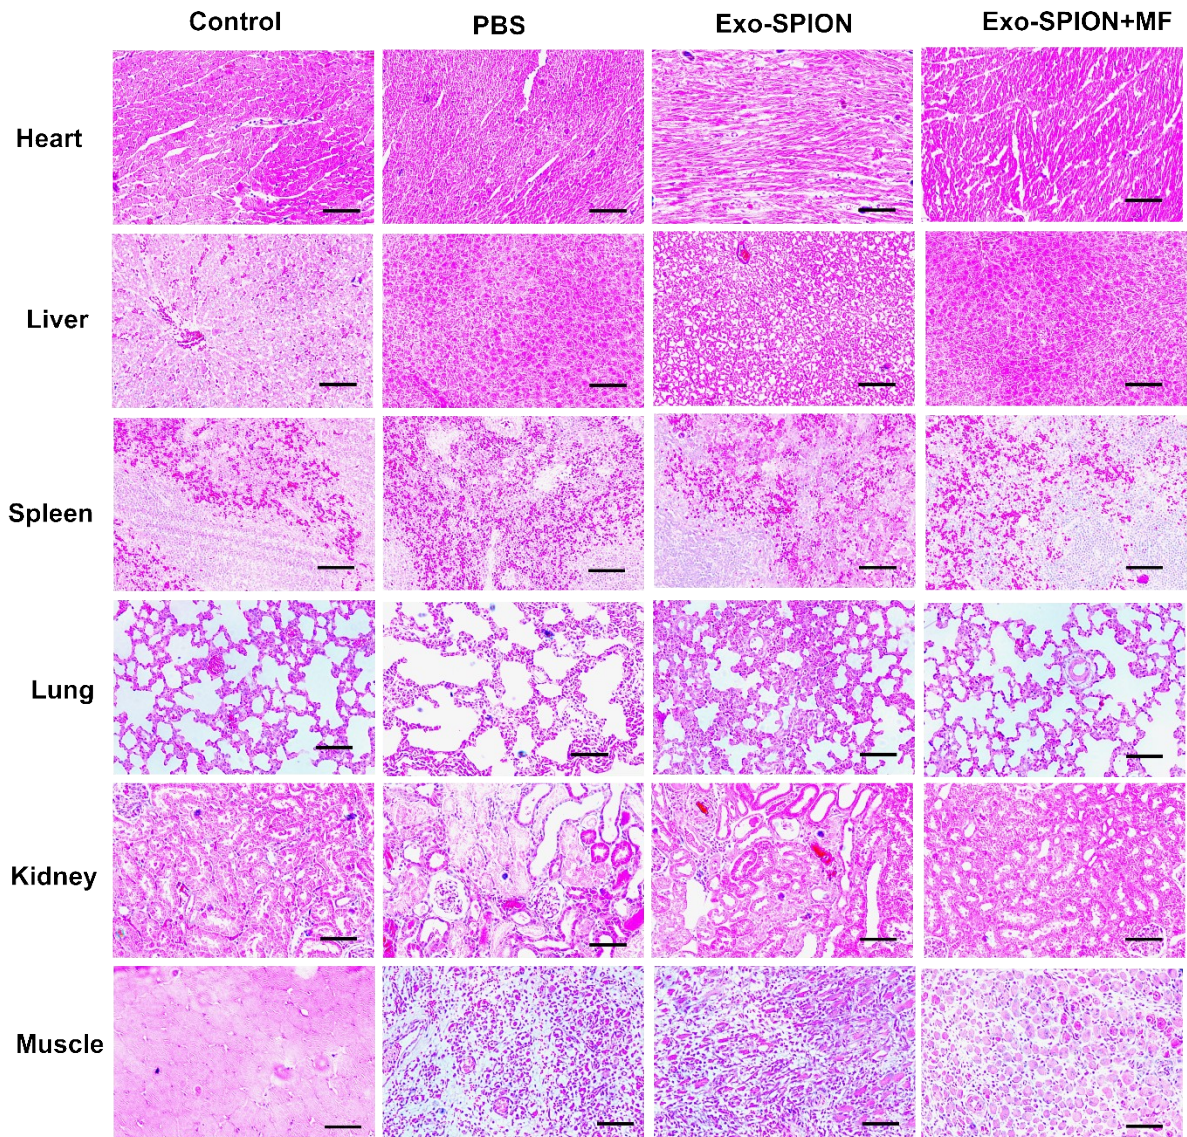

81

82 Fig.S.4. HE stains of organ toxicity in Exo-SPION. Evaluate pathological changes in heart, liver, spleen, lungs,  
 83 kidneys and muscle tissues through section microscopy examination (HE stains); Scale bar, 100  $\mu$ m. There were no  
 84 significant changes in the heart, liver, spleen and lungs. The renal tubules in the PBS and Exo-SPION groups were  
 85 severely damaged. The Exo-SPION+MF group showed significant improvement. Control muscle tissue structure is  
 86 normal. The substantial destruction of muscle fiber structure and the absence of inflammatory infiltration in the  
 87 model group. The PBS group and Exo-SPION+MF group showed significant muscle edema, muscle fiber  
 88 degeneration and atrophy.



**Fig.S.5.**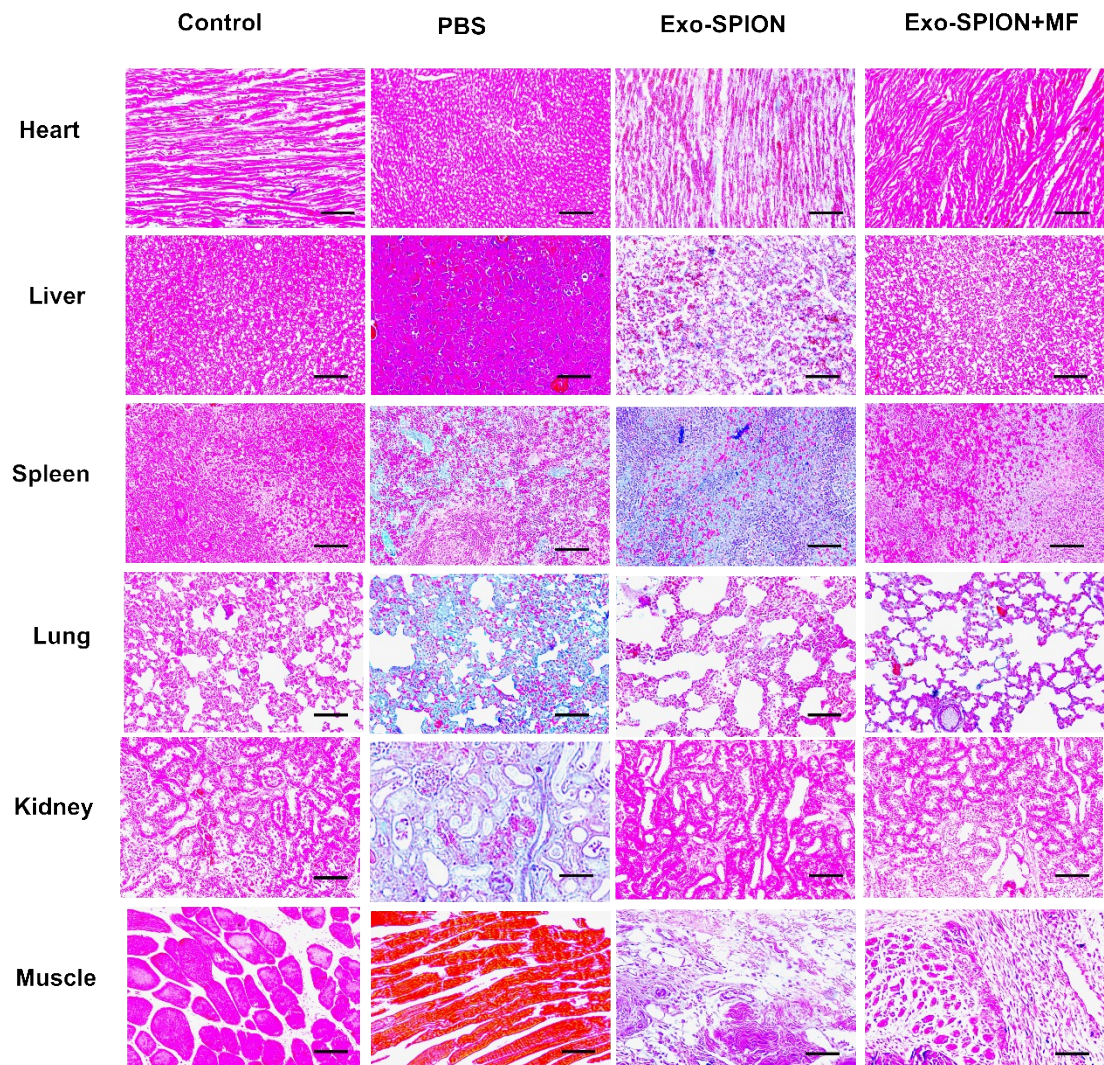

90

91 Fig.S.5. Masson stains of organ toxicity in Exo-SPION. Evaluate pathological changes in heart, liver,

92 spleen, lungs, kidneys and muscle tissues through section microscopy examination; Scale bar, 100  $\mu$ m.

93

**Fig.S.6.**

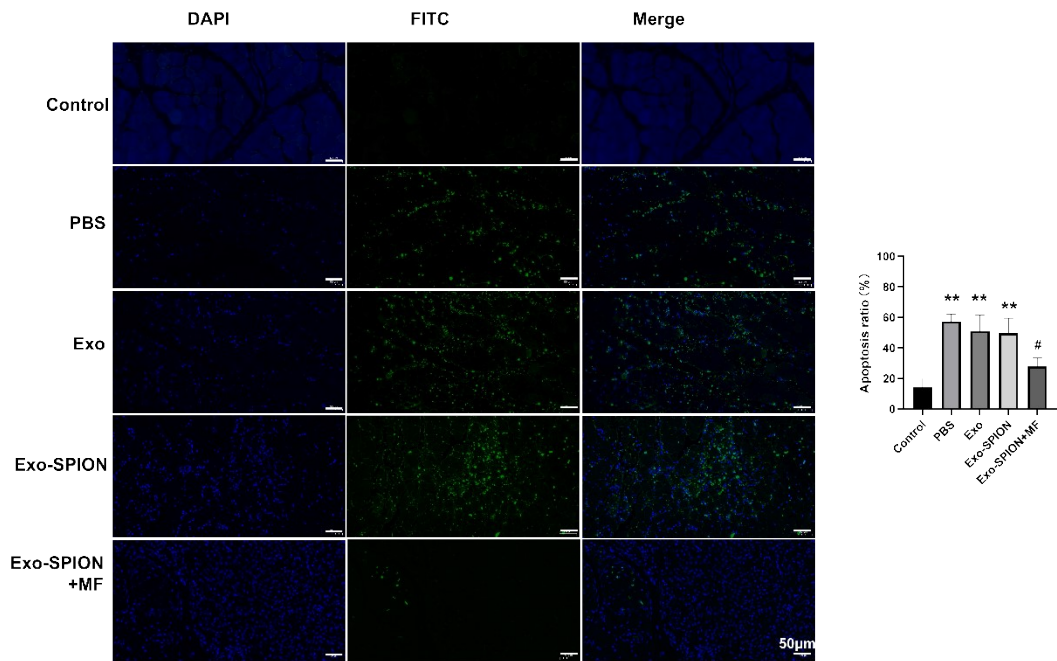

94

95 Fig.S.6. Percentage of apoptotic positive cells in muscle tissue of rats in each group. \*\*  $P < 0.01$  compared to  
 96 the Control group. #  $P < 0.05$  compared to PBS group.

97

**Fig.S.7.**

98

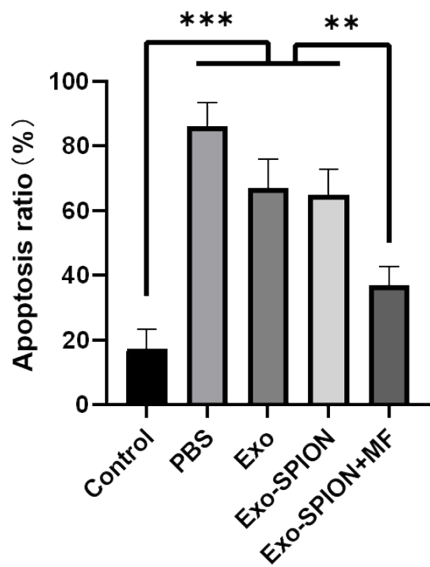

99

100 Fig.S.7. The percentage of apoptotic positive cells in renal tissue of rats in each group. \*\*  $P < 0.01$ , \*\*\*  $P < 0.001$ .



101

102 **Fig.S.8.**

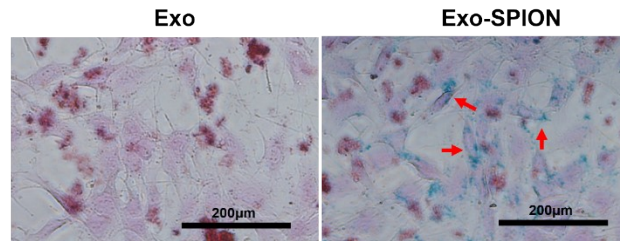

103

104 Fig.S.8. Exo-SPION internalized by L6 cells. Blue represents the SPION in the cell (red arrow). Scale bar,  
105 200µm.

106 To verify the results of in vitro modeling, cells were stimulated with inducer H<sub>2</sub>O<sub>2</sub>  
107 (200 µM) for 10 minutes and treated with LPS (100 ng/mL) for 24 hours. The viability  
108 of L6 cells was detected using CCK-8. The CCK results showed (Fig.S.9) that the cell  
109 viability of the H<sub>2</sub>O<sub>2</sub> modeling group was significantly reduced compared to the control  
110 group ( $P < 0.01$ ). At the same time, the cell viability of the LPS modeling group  
111 significantly decreased compared to the control group ( $P < 0.05$ ), indicating the success  
112 of in vitro modeling.

113 **Fig.S.9.**

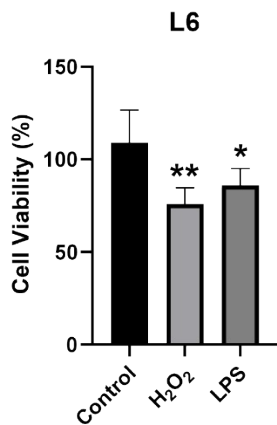

114

115 Fig.S.9. CCK detection of the effects of H<sub>2</sub>O<sub>2</sub> and LPS stimulation on L6 cells. \*  $P < 0.05$ ,  
116 \*\* $P < 0.01$  relative to the Control group.

117

**Fig.S.10.**

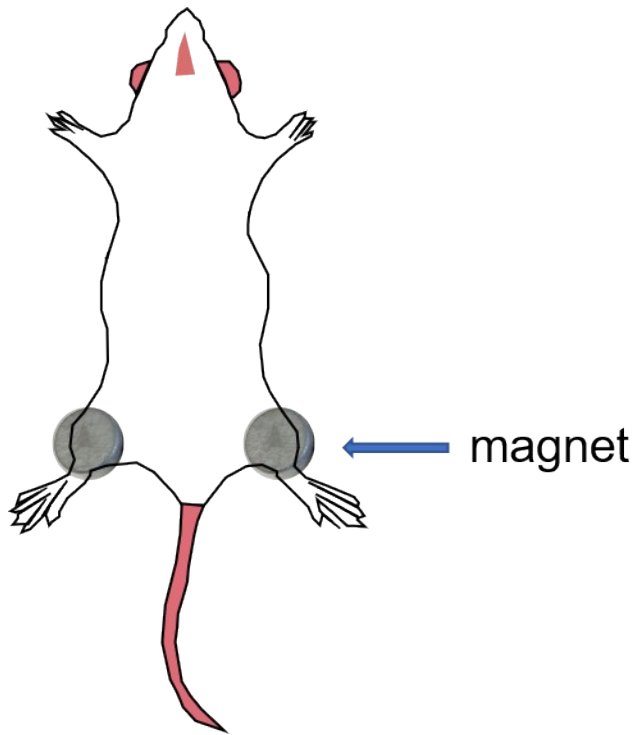

118

119 Fig.S.10. Placement of the magnets during the treatment process.
